# Supplementary material for: Exosomes/MoS2 complex for targeting and effective photothermal therapy
Source: Research Square preprint supplement (doi:10.21203/rs.3.rs-6226702/v1), 2025-03-31
Supplement: Supplementary file 1 [file e8b9187dd9238e9cb22d4aff.docx]

***Supporting Information***

**Exosomes/MoS2 complex for targeting and effective photothermal therapy**

Liyan Wang#,1, Huizhi Chen#,1,2, Haiyan Qiu1, Zhenyu Xie1, Shah Zada1, Jianbo Sun1, Chengyu Lu1,2, Zhan Zhou3, Xinsheng Peng1,*, Ruizheng Liang1,4,*, Yubin Zhou1,2,*

1Dongguan Key Laboratory of Advanced Drug Delivery and Biosensing Research and Development, The First Dongguan Affiliated Hospital, School of Pharmacy, Guangdong Medical University, Dongguan, 523808, China

2Research Center of Nano Technology and Application Engineering, Dongguan Innovation Institute, Guangdong Medical University, Dongguan, 523808, China

3College of Chemistry and Chemical Engineering, Henan Key Laboratory of Function-Oriented Porous Materials, Luoyang Normal University, Luoyang, 471934, China

4State Key Laboratory of Chemical Resource Engineering, Beijing Advanced Innovation Center for Soft Matter Science and Engineering, Beijing University of Chemical Technology, Beijing, 100029, China

# These authors contributed equally to this work.

* Corresponding authors.

Email address: xspeng@gdmu.edu.cn (Xinsheng Peng), liangrz@buct.edu.cn (Ruizheng Liang), zhouyb@gdmu.edu.cn/ zybresearch@126.com (Yubin Zhou)

**
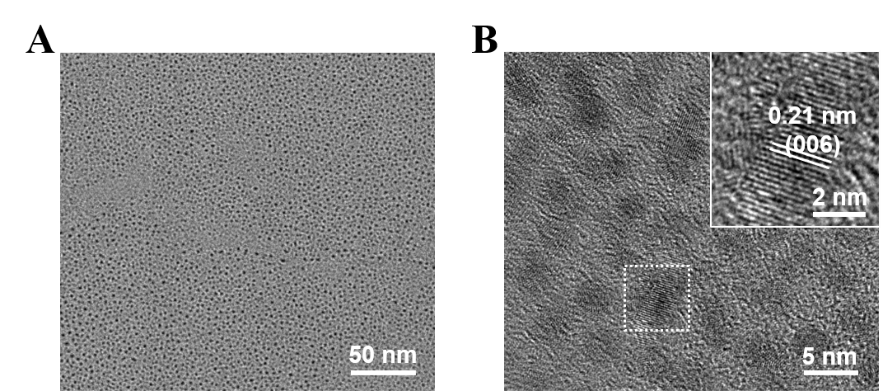
**

**Fig. S1** (A) TEM and (B) HRTEM images of the MoS2 nanodots. Inset of (B) is the expanded section of the dashed box area.


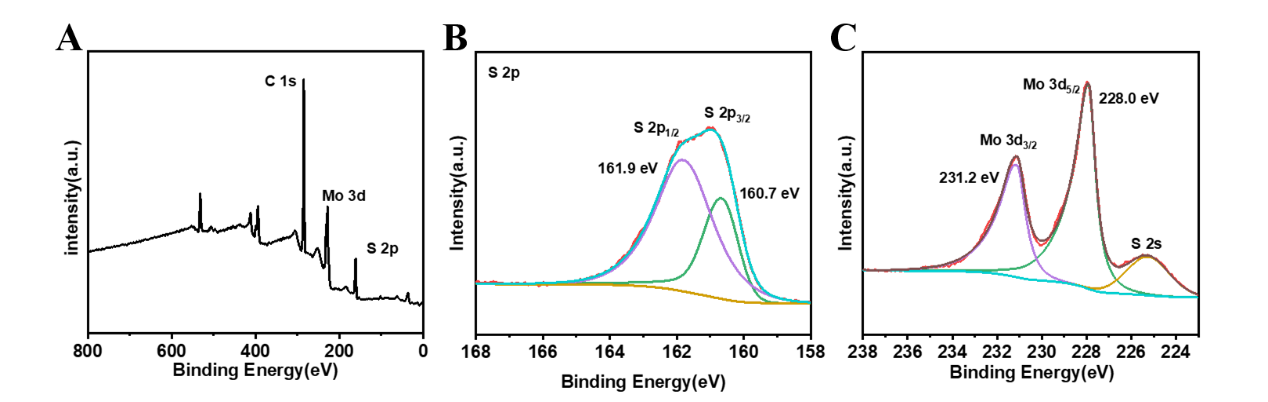


**Fig. S2** XPS (A) survey spectra and high-resolution (B) S 2p, (C) Mo 3d spectra of the MoS2 nanodots.

**
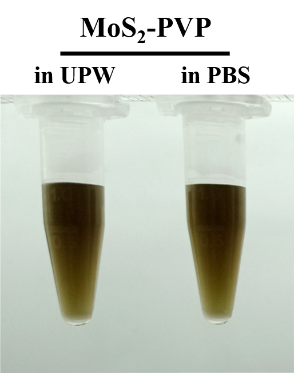
**

**Fig. S3** The appearance of MoS2-PVP in ultrapure water (UPW) and PBS.


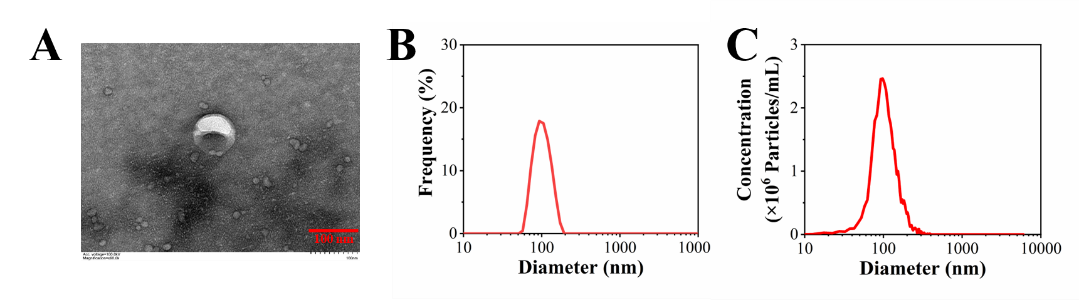


**Fig. S4** Characterization of ME (MCF-7 exosomes). (A) The morphology of ME analyzed by TEM (Scale bar = 100 nm). (B) The size distribution of ME measured by DLS, and (C) corresponding NTA measurement.


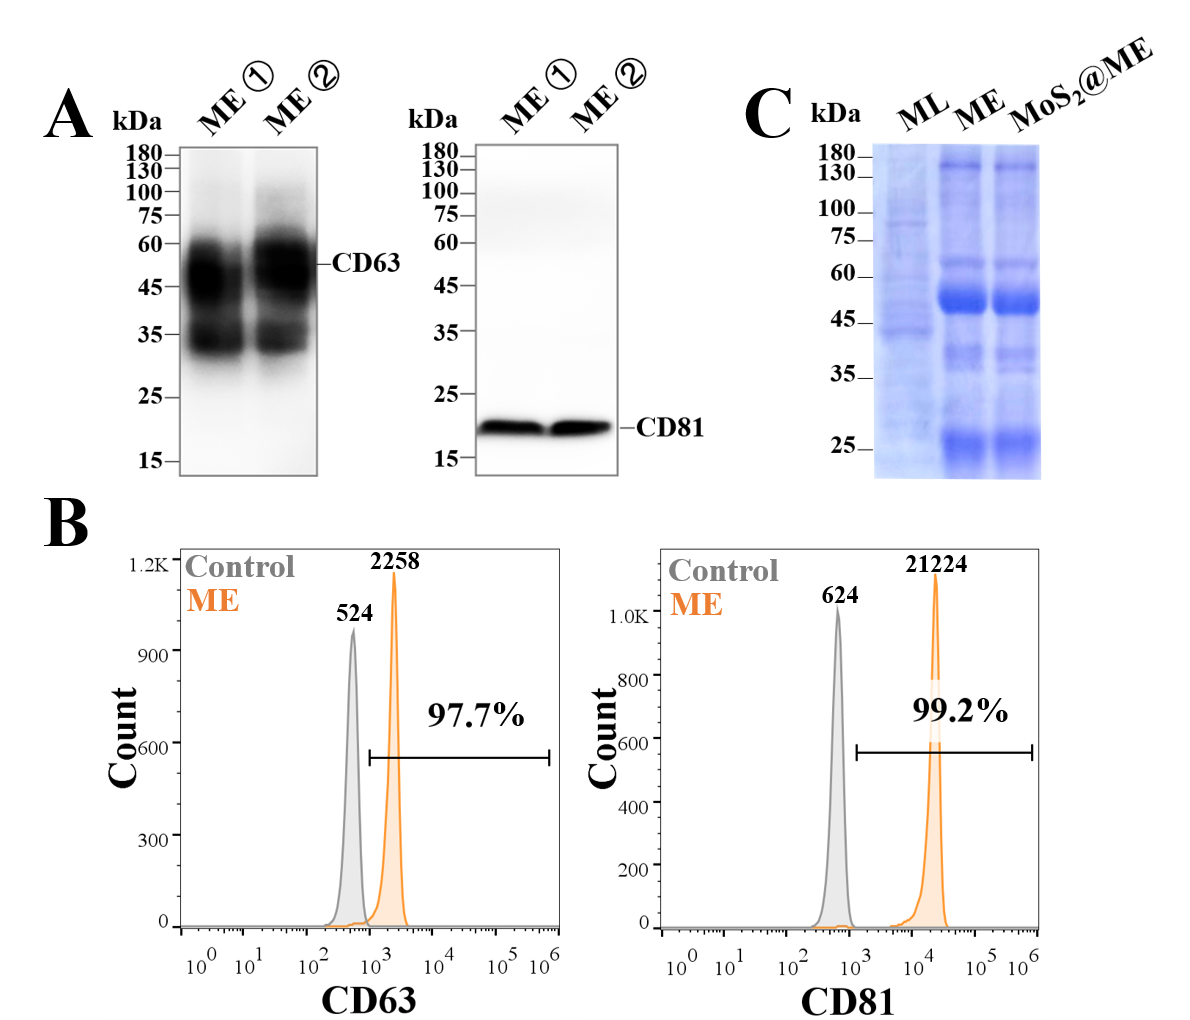


**Fig. S5** The exosomal proteins of ME detected by (A) Western Blot, (B) FCM, and (C) SDS-PAGE.


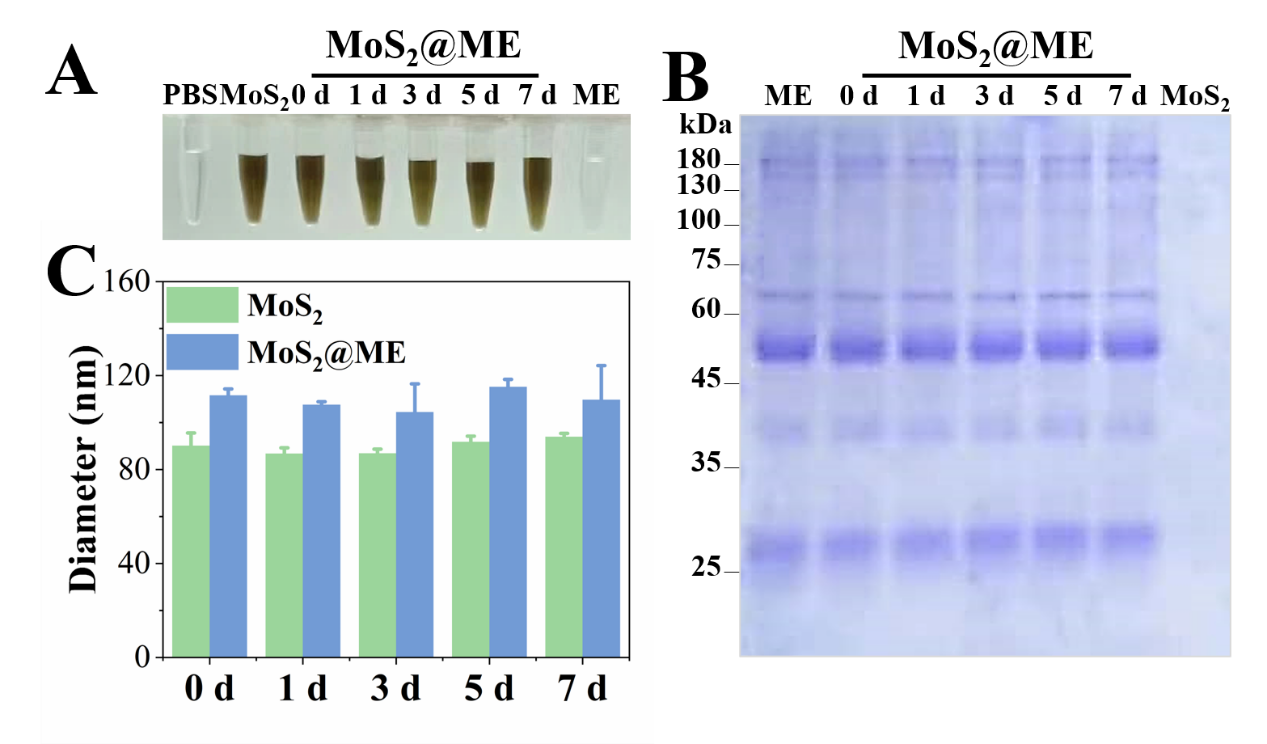


**Fig. S6** The storage stability of MoS2@ME at 4℃. (A) The appearance. (B) The major proteins analyzed by SDS-PAGE. (C) The particle sizes of MoS2 and MoS2@ME.


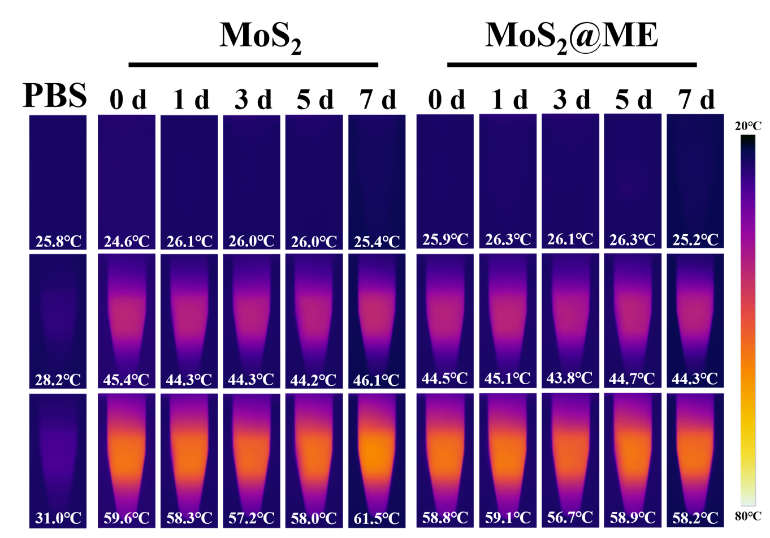


**Fig. S7** The photothermal performance of MoS2 and MoS2@ME after storage for 7 days.


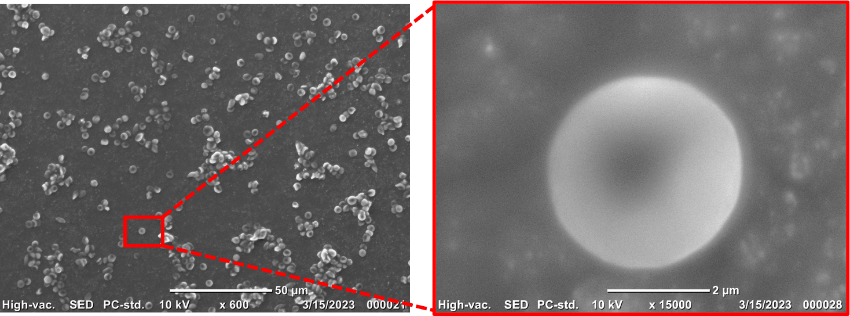


**Fig. S8** The morphology of red blood cells after treatment with MoS2@ME.


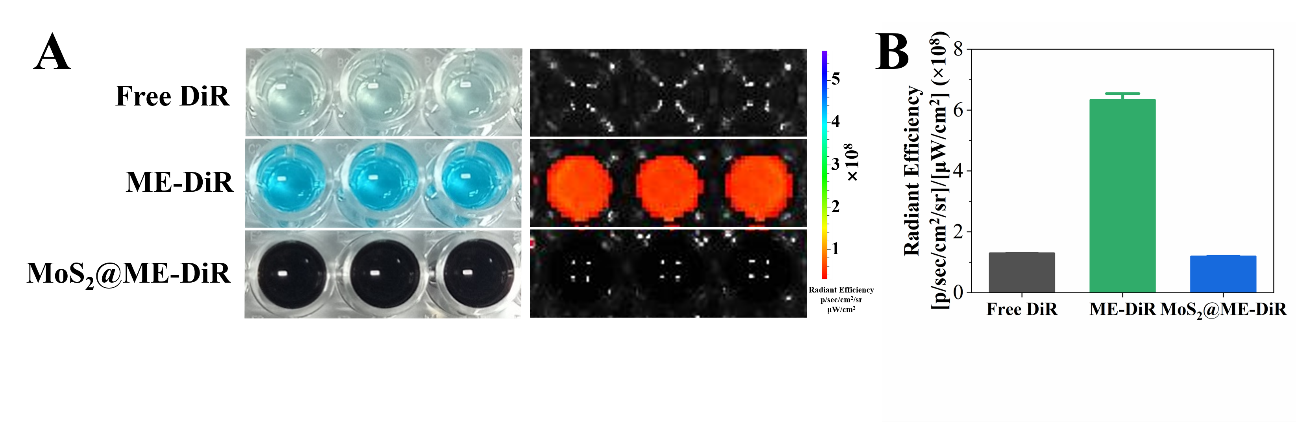


**Fig. S9** Photos (A) of free DiR, DiR-labelled exosomes and DiR-labelled MoS2@ME. (B) Corresponding fluorescence intensity.


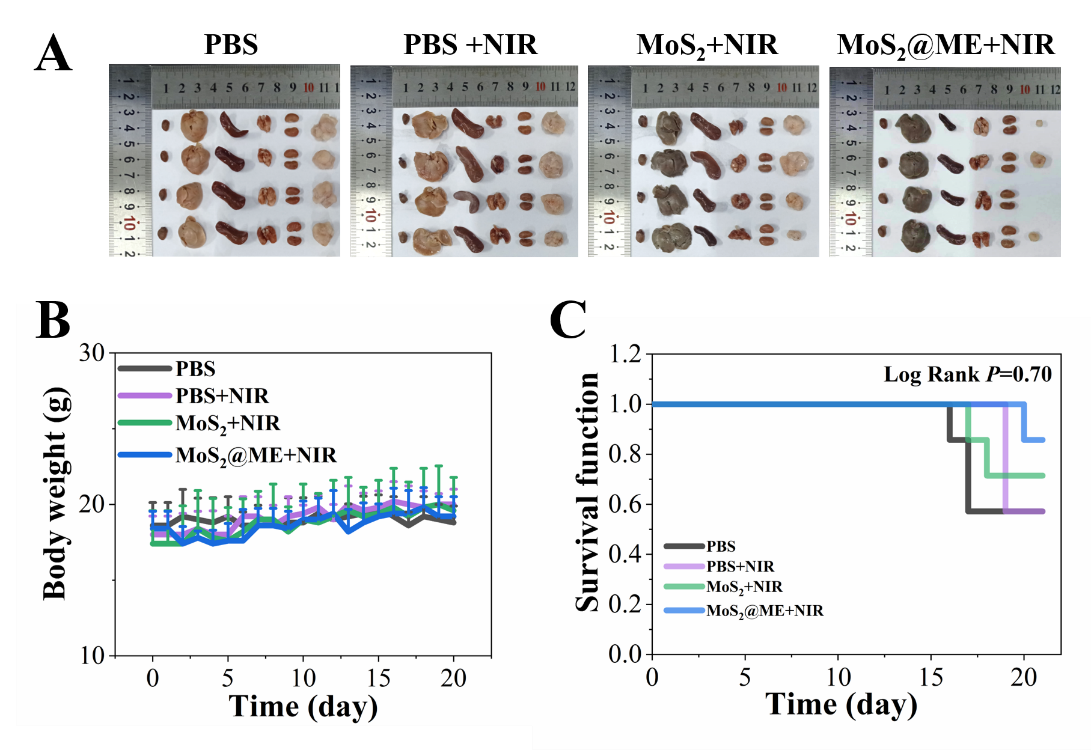


**Fig. S10** Impact of the treatment on the main organs (A), body weights (B) and survival function (C) of the model mice.


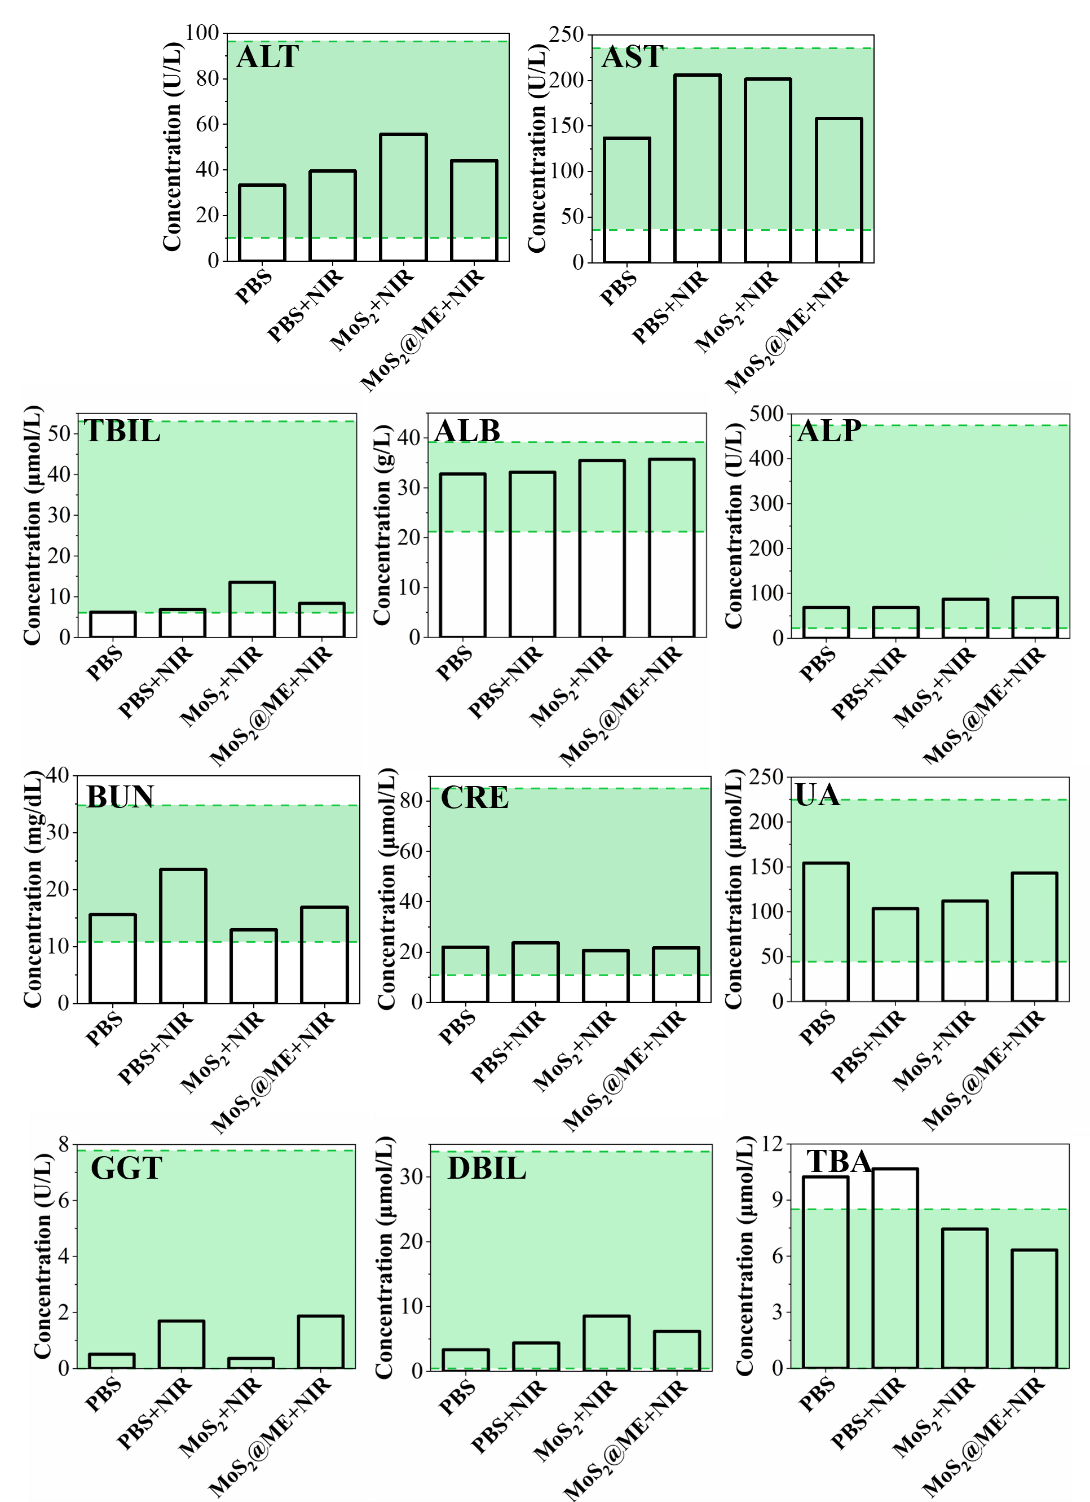


**Fig. S11** Changes of main indicators of liver and kidney in mice after various treatments.


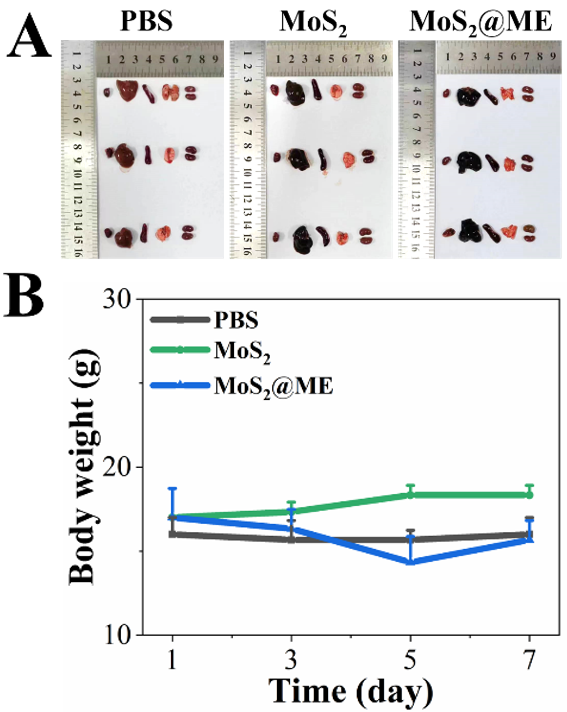


**Fig. S12** Biosafety evaluation of MoS2@ME in normal mice. (A) Picture of the main organs. (B) The body weight changes of mice after different treatments during 7 days.


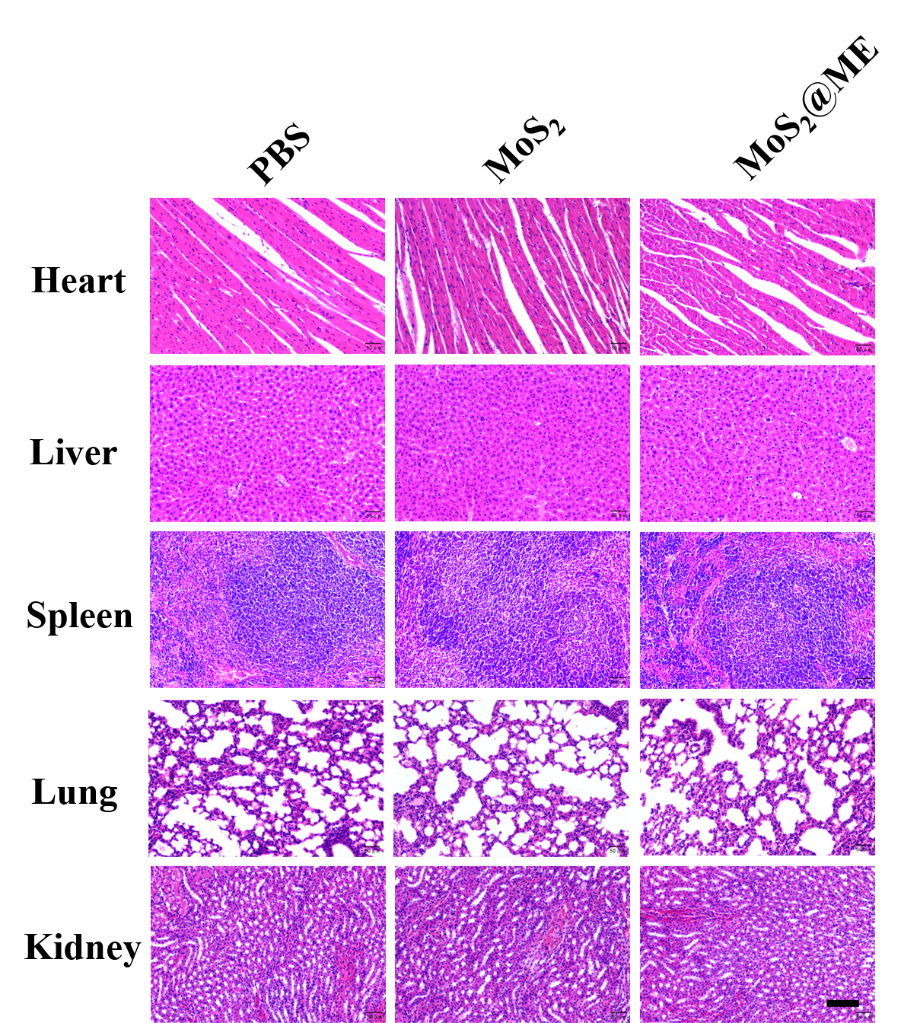


**Fig. S13** H&E staining results of main organs in normal mice treated with PBS, MoS2 and MoS2@ME, respectively (Scale bar = 100 μm).
